# Supplementary material for: An ancestral retroviral protein identified as a therapeutic target in type-1 diabetes
Source: JCI journal article supplement (doi:10.1172/jci.insight.94387), 2017-09-06
Supplement: sd1 [file 1]

## SUPPLEMENTAL METHODS

**HERV-W-Env staining using GN\_mAb\_Env04 antibody:** A preliminary IHC study was performed on pancreata from a pilot cohort of 6 non-T1D controls and 11 T1D donors. For this study, one pancreas section was obtained for each donor and the staining was performed using GN\_mAb\_Env04 antibody and with Dako HRP system (K0679). Slides were deparaffinized and rehydrated. Peroxidases and avidines (Dako X0590) were blocked 10 and 5 minutes respectively. GN\_mAb\_Env04 was diluted in 10% human serum at 5 $\mu$ g/mL and incubated 1 hour at room temperature before incubating for 30 minutes Polyclonal Rabbit anti Mouse IgG biotinylated 10  $\mu$ g/mL in PBS. After Streptavidin and DAB steps, hematoxylin counterstaining was applied. The slides were digitalized with the slide scanner NANOZOOMER 2.0RS/C10730-12 (Hamamatsu), objective x40.

**CD68 immunostaining:** Slides adjacent to the ones stained with GN\_mAb\_Env04 were dewaxed, rehydrated, and antigenic site retrieval was carried out by 12 minutes microwaving in 10mM Tris-1mM EDTA (pH 9). Samples were washed in PBS, and incubated with the primary antibody (monoclonal anti-human CD68, M087629-2 Dako), diluted 1/100 in PBS-3% BSA, overnight at 4°C. Endogenous peroxidase activity was blocked for 20 min with 0.5% hydrogen peroxide at room temperature and samples were incubated with the HRP mouse Envision<sup>TM</sup> System (Dako, K4000) for 45 minutes at room temperature. Antigen-antibody complexes were revealed by DAB (Dako, K3468) and cells were slightly counterstained with Mayer's hematoxylin (Diapath, ref. C0303). Sections were mounted with aqueous medium for microscopic observation.

**Supplemental Table 1: Antibodies**

| Antibody                    | Supplier           | Reference        | Type                                          | Working Concentration |
|-----------------------------|--------------------|------------------|-----------------------------------------------|-----------------------|
| <b>ELISA</b>                |                    |                  |                                               |                       |
| GN_mAb_Env04                | Geneuro-Innovation | GN_mAb_Env04     | Monoclonal mouse IgG1                         | 2.5µg/ml              |
| GN_mAb_Env16                | Geneuro-Innovation | GN_mAb_Env16     | Monoclonal mouse IgG2a                        | 2.5µg/ml              |
| GN_mAb_Env01-HRP            | Geneuro-Innovation | GN_mAb_Env01-HRP | Monoclonal mouse IgG1                         | 0.5µg/ml              |
| <b>IHC</b>                  |                    |                  |                                               |                       |
| Isotype mouse IgG2a         | Abcam              | Ab18415          | Monoclonal mouse IgG2a                        | 0.5 mg/mL             |
| GN_mAb_Env03                | Geneuro-Innovation | GN_mAb_Env03     | Monoclonal mouse IgG2a                        | 5 µg/mL               |
| Anti-insulin                | Cell Signaling     | 3014             | Rabbit monoclonal                             | 1/400                 |
| Rabbit IgG isotype          | Abcam              | ab172730         | Rabbit monoclonal EPR25A                      | 10 µg/mL              |
| Anti-glucagon               | Sigma              | G2654            | Mouse IgG1 clone K79bB10                      | 1/64000               |
| Mouse IgG1 isotype          | Abcam              | ab18447          | Mouse IgG1, kappa monoclonal [MG1-45]         | 1.16 µg/mL            |
| GN_mAb_Env04                | Geneuro-Innovation | GN_mAb_Env04     | Monoclonal mouse IgG1                         | 5 µg/mL               |
| Monoclonal mouse IgG1       | Abcam              | ab18448          | Mouse IgG1 kappa monoclonal MG1-45            | 5 µg/mL               |
| Anti-Mouse IgG biotinylated | Dako               | E0464            | Polyclonal Rabbit anti Mouse IgG biotinylated | 10 µg/mL              |
| <b>Immunofluorescence</b>   |                    |                  |                                               |                       |
| Anti-CD68                   | Dako               | M0876            | Mouse Monoclonal IgG3 PG-M1                   | 3 µg/mL               |
| Anti-CD3                    | Dako               | A0452            | Rabbit Polyclonal                             | 12 µg/mL              |
| Donkey anti-rabbit 547      | Interchim          | FP-SB 5110       | Donkey Polyclonal                             | 4 µg/mL               |
| Donkey anti-mouse 647       | Interchim          | FP-SC 4110       | Donkey Polyclonal                             | 20 µg/mL              |
| Anti-Glucagon-AF488         | Interchim          | BS-3796R-A488    | Rabbit Polyclonal conjugated AF488            | 10 µg/mL              |
| <b>Cell Culture</b>         |                    |                  |                                               |                       |
| GNbAC1                      | Geneuro            | GNbAC1           | Humanized monoclonal antibody IgG4            | 3µg/mL                |

**Supplemental Table 2: Primers**

| Description                                  | Primers name | Forward primer                       | Reverse primer                     |
|----------------------------------------------|--------------|--------------------------------------|------------------------------------|
| Mouse genotyping, detection of the transgene | CAG-Env      | ACGTCAGTAGTCATAGGAACTGCG<br>GTCG     | TACAGGCCGTGAACCACTGCTC<br>CCT      |
| Mouse genotyping, detection of WT HPRT locus | WT-HPRT      | TGTCCTTAGAAAACACATATCCAG<br>GGTTTAGG | CTGGCTTAAAGACAACATCTG<br>GGAGAAAAA |
| <i>HERV-W-env</i> detection in human PBMC    | UNO          | GTATGTCTGATGGGGGTGGAG                | CTAGTCCTTTGTAGGGGCTAG<br>AG        |
| Housekeeping gene <i>B2M</i>                 | B2M          | TTACTCACGTCATTGAGCAG                 | GATGGATGAAACCCAGACAC               |
| Housekeeping gene <i>YWHAZ</i>               | YWHAZ        | TCTCATAATAGAACACAGAGAAGT             | TCAGTCACAACAAGCATACC               |

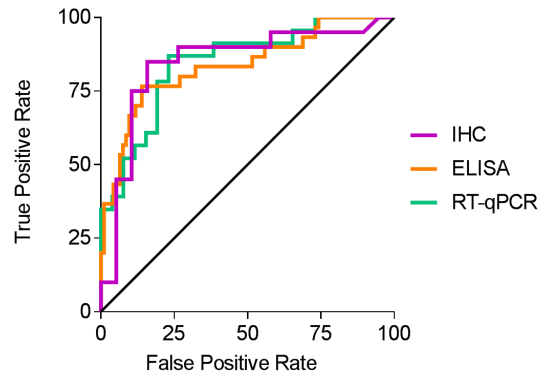

**Supplemental figure 1: Performance of HERV-W-Env detection in human T1D patients and controls individuals.**

Receiver Operating Characteristic (ROC) curves of HERV-W-Env detection by ELISA in serum (orange line), by RT-qPCR in PBMC (green line) and by IHC in pancreas (violet line). AUC of ROC curve for detection in the serum by ELISA is 0.8362 (CI95: 0.7464 to 0.926;  $p < 0.0001$ ), AUC of ROC curve for detection in PBMC by RT-qPCR is 0.8462 (CI95: 0.7367 to 0.9556;  $p < 0.0001$ ) and AUC of ROC curve for detection in the pancreas by IHC is 0.8461 (CI95: 0.7112 to 0.9809;  $p = 0.0002$ ).

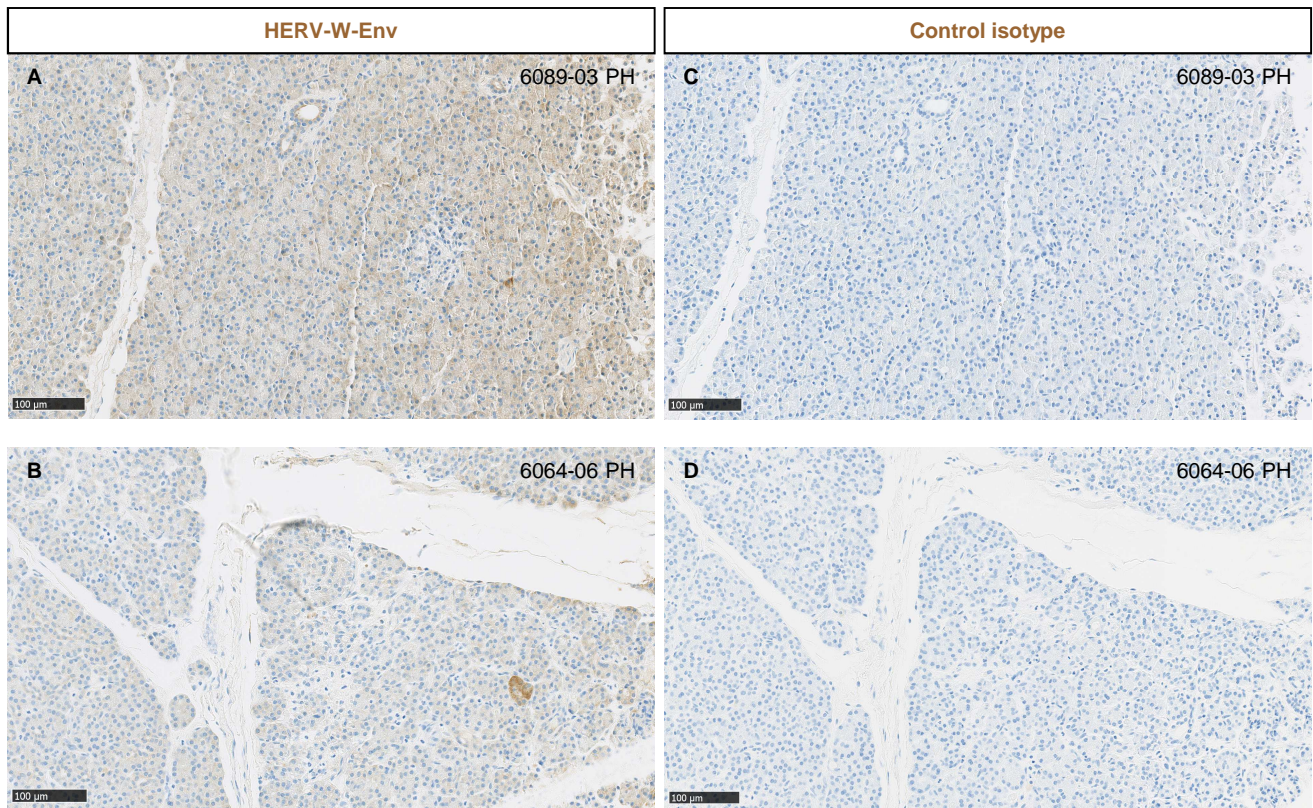

**Supplemental Figure 2: Immunostaining of HERV-W-Env using GN\_mAb\_Env03 antibody and IgG2a control.**

Two T1D nPOD cases stained with GN\_mAb\_Env03 are presented in **A** and **B** with their respective IgG2A controls in **C** and **D** on adjacent slides. nPOD case ID is indicated in the upper right corner, with block number and pancreas zone (PH: pancreas head). Scale bars: 100 µm.

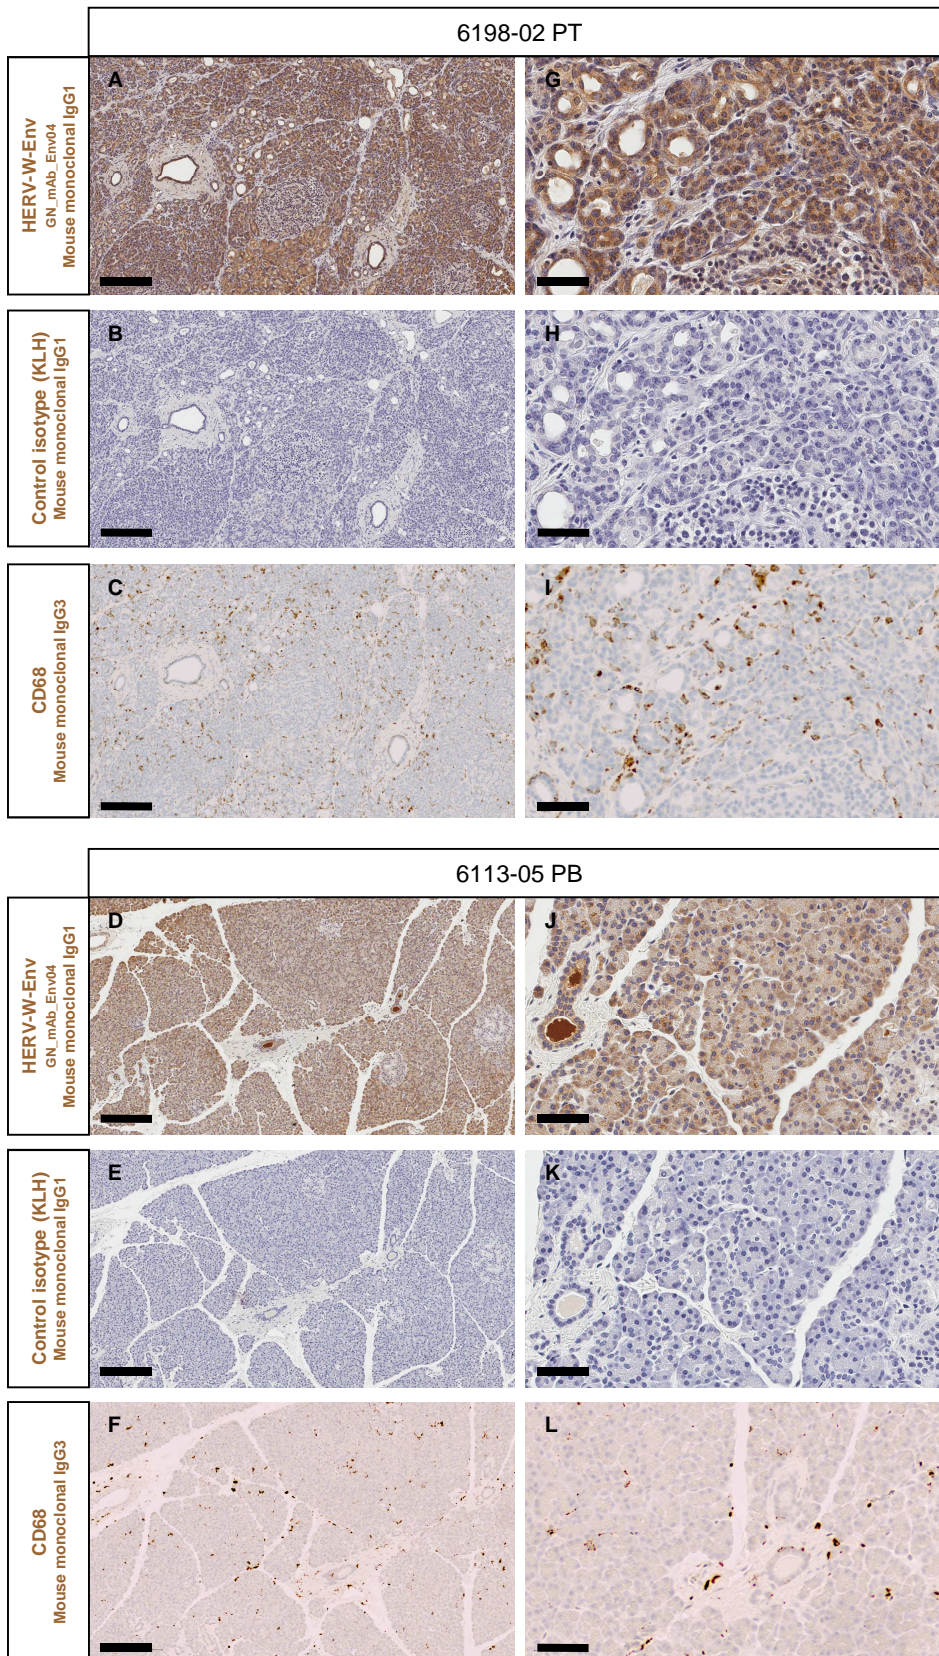

**Supplemental Figure 3: HERV-W-Env immunostaining using GN\_mAb\_Env04, control isotype IgG1 and CD68 immunostaining.**

Two pancreas from T1D nPOD cases stained with GN\_mAb\_Env04 (Mouse monoclonal IgG1 antibody) are presented in **A, G, D** and **J**, with their respective IgG1 controls in **B, H, E** and **K** on adjacent slides (Control isotype (KLH) Mouse monoclonal IgG1 - ab 18448 Abcam). GN\_mAb\_Env04 does not recognize the same epitope that GN\_mAb\_Env03 used in the main IHC study. CD68 staining (mouse monoclonal IgG3 antibody - M087629-2 Dako) is also provided in **C, I, F** and **L** to show another specific staining with comparable macrophage infiltration than in the main study (Figure 3B). Same areas are presented for each staining; right panels correspond to magnifications of left panels. Right scale bars: 200µm; Left scale bars 50µm. PT: pancreas tail, PB: pancreas body.

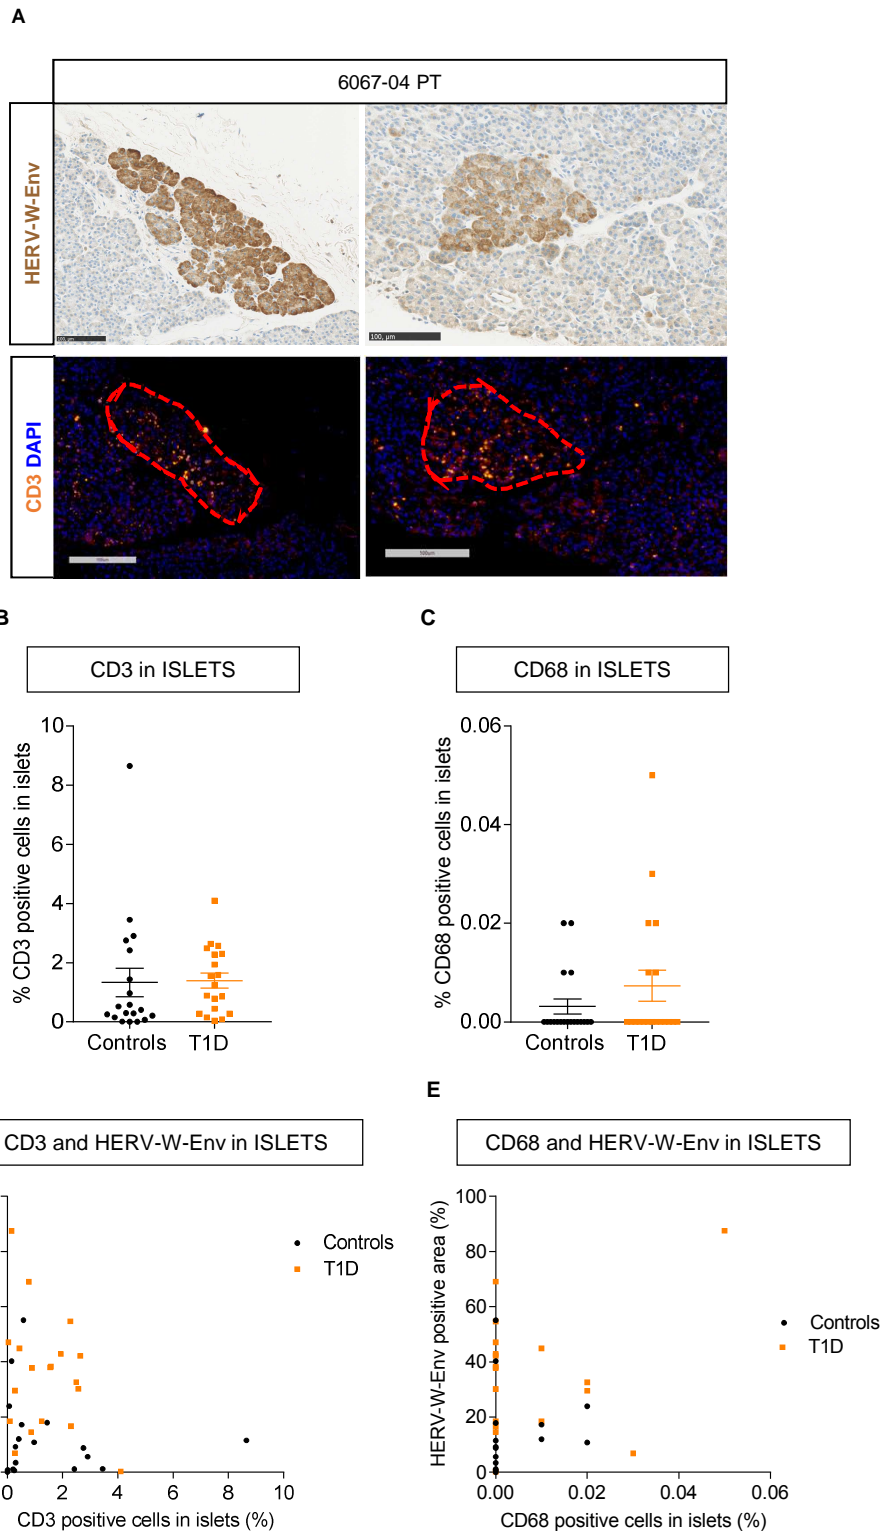

**Supplemental Figure 4: Pro-inflammatory features associated with HERV-W-Env expression within pancreatic islets**

(A) Pancreas of nPOD case #6067, which presented several clusters of acinar cells over-expressing HERV-W-Env, was immunostained with GN\_mAb\_Env03 (upper panels) and anti-CD3 (lower panels) antibodies on adjacent slides. Upper and lower panels correspond to images of the same areas respectively. Clusters of acinar cells over-expressing HERV-W-Env are highlighted by red dot lines in lower panels. Scale bars: 100 $\mu$ m.

(B, C, D, E) Number of CD3 and CD68 positive cells in the endocrine part of the pancreas was assessed on pancreas slices from non-T1D controls (n=19) and T1D patients (n=20). Percentages of CD3+ cells (B) and CD68+ cells (C) in the endocrine pancreas are presented for controls and T1D patients and as a function of HERV-W-Env positively stained area (D and E respectively) (cf. figure 1 C). For B and C, results are presented as individual values, and as mean  $\pm$ SEM.
